# Supplementary material for: Synergy between the small intrinsically disordered protein Hsp12 and trehalose sustain viability after severe desiccation
Source: eLife. 2018 Jul 16;7:e38337. doi: 10.7554/eLife.38337 (PMC6054528; doi:10.7554/eLife.38337)
Supplement: Figure 1—source data 1. [file elife-38337-fig1-data1.xlsx]

## Sheet: Sheet1
Figure 1.
A.
Strain	DT*100	SD*100
WT 2 day	34	3.45465
WT 15 Day	29	5.45461
WT 30 Day	11	6.21221
tps1_ 2 day	16	9.48262
tps1_ 15 day	4.1	2.32362
tps1_ 30 day	0.06	0.0441814
hsp12∆ 2 day	28	8.40952
hsp12∆ 15 day	26	14.9773
hsp12∆ 30 day	8.67	5.3133
tps1_hsp12_ 2 day	0.066	0.0204039
tps1_hsp12_ 15 day	0.0007	0.000420476
tps1_hsp12_ 30 day	0	#DIV/0!
B.
Strain	media	DT*100	SD*100
nth1 - ev	SC-HIS	0.0005	0.000316228
nth1 - HSP12	SC-HIS	0.856	0.445356
nth1-AGT1 - ev	SC-HIS	0.0014	0.00138101
nth1-AGT1 - HSP12	SC-HIS	0.55641	0.496552
nth1 - ev	SC-HIS + trehalose	0.000818182	0.000166114
nth1 - HSP12	SC-HIS + trehalose	0.277778	0.23971
nth1-AGT1 - ev	SC-HIS + trehalose	0.909091	0.434808
nth1-AGT1 - HSP12	SC-HIS + trehalose	65	28.9935
