# Supplementary material for: Synergy between the small intrinsically disordered protein Hsp12 and trehalose sustain viability after severe desiccation
Source: eLife. 2018 Jul 16;7:e38337. doi: 10.7554/eLife.38337 (PMC6054528; doi:10.7554/eLife.38337)
Supplement: Figure 2—source data 1. [file elife-38337-fig2-data1.xlsx]

## Sheet: Sheet1
Figure 2.
A-B.
24, 5 hr dry
	CS alone	CS Alone	Hsp12 675	Hsp12 675	Hsp12 225	Hsp12 225	Hsp12 75	Hsp12 75	Hsp12 25	Hsp1225	Hsp12 8.33	Hsp12 8.33
Duplicate	A	B	A	B	A	B	A	B	A	B	A	B
Agg (340nm)	0.087	0.101	0.01	0.018	0.029	0.052	0.109	0.097	0.082	0.085	0.129	0.169
Avg Agg		0.094		0.014		0.0405		0.103		0.0835		0.149
Stand err		0.00494975		0.00282843		0.00813173		0.00424264		0.00106066		0.0141421
Blanked against Controls		0.1195		-0.005		0.0175		0.099		0.1055		0.169
Propagation of error		0.00496236		0.00291548		0.00840387		0.00424264		0.00237171		0.0141598
Start Enz Act	0.057	0.072	0.098	0.062	0.067	0.066	0.054	0.056	0.061	0.054	0.051	0.053
End Enz Act	0.289	0.329	0.531	0.52	0.535	0.522	0.478	0.442	0.342	0.345	0.333	0.343
Difference	0.232	0.257	0.433	0.458	0.468	0.456	0.424	0.386	0.281	0.291	0.282	0.29
Avg Difference		0.2445		0.4455		0.462		0.405		0.286		0.286
Standard err		0.00883883		0.00883883		0.00424264		0.013435		0.00353553		0.00282843
Relative to controls		0.565972		1.01945		1.04054		0.886214		0.641256		0.641975
percent		56.5972		101.945		104.054		88.6214		64.1256		64.1975
Propagation of error		0.0212018		0.0208228		0.0177128		0.0296847		0.0106531		0.0107389
adjusted to percent		2.12018		2.08228		1.77128		2.96847		1.06531		1.07389
C-D.
24, 5 hr dry
	CS alone	CS Alone	Tre 900	tre 900	tre 300	tre 300	tre 100	tre 100	tre 33.33	tre 33.33	tre 11.11	tre 11.11
Duplicate	A	B	A	B	A	B	A	B	A	B	A	B
Agg (340nm)	0.093	0.093	-0.025	-0.025	-0.018	-0.018	0.012	0.005	0.068	0.051	0.064	0.119
Avg Agg		0.093		-0.025		-0.018		0.0085		0.0595		0.0915
Stand err		0		0		0		0.00247487		0.00601041		0.0194454
Blanked against Controls		0.1185		-0.007		0.0075		0.0355		0.0865		0.121
Propagation of error		0.00388909		0.00353553		0.000353553		0.00431567		0.00617454		0.0194743
Start Enz Act	0.057	0.072	0.098	0.062	0.067	0.066	0.054	0.056	0.061	0.054	0.051	0.053
End Enz Act	0.289	0.329	0.531	0.52	0.535	0.522	0.478	0.442	0.342	0.345	0.333	0.343
Difference	0.232	0.257	0.433	0.458	0.468	0.456	0.424	0.386	0.281	0.291	0.282	0.29
Avg Difference		0.2445		0.4455		0.462		0.405		0.286		0.286
Standard err		0.00883883		0.0125		0.006		0.019		0.005		0.004
Relative to controls		0.52694		0.918557		0.928643		0.812437		0.590909		0.572
percent		52.694		91.8557		92.8643		81.2437		59.0909		57.2
Propagation of error		0.0144067		0.0237001		0.00854068		0.027321		0.00770212		0.0056857
adjusted to percent		1.44067		2.37001		0.854068		2.7321		0.770212		0.56857
