# Supplementary material for: Synergy between the small intrinsically disordered protein Hsp12 and trehalose sustain viability after severe desiccation
Source: eLife. 2018 Jul 16;7:e38337. doi: 10.7554/eLife.38337 (PMC6054528; doi:10.7554/eLife.38337)
Supplement: Figure 3—source data 1. [file elife-38337-fig3-data1.xlsx]

## Sheet: Sheet1
Figure 3.
A.
[PSI+]	DT*100	SD*100
WT	139.535	78.015	No Stress
hsp12::HYG	263.158	94.8324	No Stress
tps1::G418	200	79.0569	No Stress
tps1::G418 hsp12::HYG	157.143	37.6308	No Stress
WT	14	4.86621	2 Day Dry
hsp12::HYG	17.5	20.406	2 Day Dry
tps1::G418	0.0585714	0.0401683	2 Day Dry
tps1::G418 hsp12::HYG	0.0818182	0.0166114	2 Day Dry
B.
[GAR+]	DT*100	SD*100
WT	14	4.86621	No Stress
hsp12::HYG	7.33333	2.2784	No Stress
tps1::G418	0.481481	0.332007	No Stress
tps1::NAT hsp12::HYG	0.02	0.00707107	No Stress
WT	1.4	0.486621	2 Day Dry
hsp12::HYG	0.333333	0.133333	2 Day Dry
tps1::G418	0	#DIV/0!	2 Day Dry
tps1::NAT hsp12::HYG	0	#DIV/0!	2 Day Dry
