# Supplementary material for: Synergy between the small intrinsically disordered protein Hsp12 and trehalose sustain viability after severe desiccation
Source: eLife. 2018 Jul 16;7:e38337. doi: 10.7554/eLife.38337 (PMC6054528; doi:10.7554/eLife.38337)
Supplement: Figure 5—source data 1. [file elife-38337-fig5-data1.xlsx]

## Sheet: Sheet1
Figure 5.
A.
WT	36	7.01507
8X Delete	15	4.96325
B.
		DT*100	SD*100
EV	SC-HIS	0.0005	0.000316228
Stf2 o/e	SC-HIS	0.0022	0.00207538
nth1-AGT1 - ev	SC-HIS + trehalose	0.609091	0.434808
Stf2 o/e	SC-HIS + trehalose	0.857143	0.400957
WT 2 day	YPGal	34	3.45465
tps1_ 2 day	YPGal	16	9.48262
stf2	YPGal	25.5451	11.6449
tps1 stf2	YPGal	11.3333	2.73637
C.
Hsp12p alone										Hsp12p DMPG
X	CD_Signal	Error	Current	Delta_Signal	CD_Dynode	Jacket_Temp.	Blanked	MMRE	Prop of error in correct units	X	CD_Signal	Error	Current	Delta_Signal	CD_Dynode	Jacket_Temp.	Blanked	MMRE	prop of err
250	1.326	0.182	1.055	0.014	243.4	25.01	-0.09	-0.0304136	0.0906337	250	1.055	0.182	1.055	0.011	243.4	25	#REF!	#REF!	#REF!
249	1.146	0.265	1.055	0.012	244.3	25	-0.278	-0.0939443	0.111183	249	1.068	0.189	1.055	0.011	244	25.01	#REF!	#REF!	#REF!
248	1.211	0.195	1.055	0.013	245	25	-0.202	-0.0682617	0.0901384	248	0.834	0.231	1.055	0.009	244.8	25.02	#REF!	#REF!	#REF!
247	1.07	0.227	1.055	0.011	245.7	25	-0.383	-0.129427	0.0966531	247	0.714	0.183	1.055	0.008	245.8	24.98	#REF!	#REF!	#REF!
246	0.952	0.245	1.055	0.01	246.5	25.01	-0.63	-0.212895	0.103339	246	0.367	0.244	1.055	0.004	246.6	24.99	#REF!	#REF!	#REF!
245	0.849	0.196	1.055	0.009	247.3	25.01	-0.578	-0.195323	0.101604	245	-0.058	0.194	1.055	-0.001	247.5	25	#REF!	#REF!	#REF!
244	0.744	0.251	1.055	0.008	248.2	25.01	-0.765	-0.258516	0.113685	244	-0.551	0.237	1.055	-0.006	248.2	24.99	#REF!	#REF!	#REF!
243	0.535	0.244	1.055	0.006	249	25	-1.077	-0.36395	0.101469	243	-1.203	0.232	1.055	-0.013	249	25	#REF!	#REF!	#REF!
242	0.326	0.229	1.055	0.003	250.2	25	-1.366	-0.461611	0.111855	242	-1.961	0.253	1.055	-0.021	250.2	25	#REF!	#REF!	#REF!
241	0.103	0.281	1.055	0.001	251	25	-1.528	-0.516356	0.123356	241	-2.898	0.253	1.055	-0.031	251.5	25	#REF!	#REF!	#REF!
240	-0.187	0.191	1.055	-0.002	252.1	25	-1.776	-0.600162	0.0949316	240	-4.307	0.267	1.055	-0.045	252.9	24.99	#REF!	#REF!	#REF!
239	-0.502	0.314	1.055	-0.005	253.9	24.99	-2.189	-0.739727	0.144441	239	-5.765	0.281	1.055	-0.061	254.3	25	#REF!	#REF!	#REF!
238	-0.833	0.212	1.055	-0.009	255.5	25.01	-2.526	-0.853609	0.108721	238	-7.51	0.249	1.055	-0.079	256.2	25	#REF!	#REF!	#REF!
237	-1.219	0.247	1.055	-0.013	257.1	24.99	-2.847	-0.962084	0.111777	237	-9.567	0.219	1.055	-0.101	258.2	25	#REF!	#REF!	#REF!
236	-1.54	0.331	1.055	-0.016	259.1	25	-3.211	-1.08509	0.146726	236	-12.04	0.24	1.055	-0.127	260.5	25	#REF!	#REF!	#REF!
235	-1.947	0.174	1.055	-0.021	261.5	24.99	-3.629	-1.22634	0.0913816	235	-14.351	0.226	1.055	-0.151	263	25.01	#REF!	#REF!	#REF!
234	-2.43	0.286	1.055	-0.026	263.6	25	-4.067	-1.37436	0.132912	234	-17.448	0.364	1.054	-0.184	265.6	24.99	#REF!	#REF!	#REF!
233	-2.808	0.227	1.055	-0.03	266.2	24.99	-4.372	-1.47743	0.142394	233	-20.675	0.299	1.054	-0.218	268.4	25.01	#REF!	#REF!	#REF!
232	-3.054	0.277	1.054	-0.032	269.1	25	-4.615	-1.55954	0.127231	232	-24.078	0.294	1.054	-0.254	271.4	24.99	#REF!	#REF!	#REF!
231	-3.253	0.224	1.054	-0.034	271.7	25	-4.758	-1.60787	0.112931	231	-27.575	0.273	1.054	-0.291	274.5	25.01	#REF!	#REF!	#REF!
230	-3.64	0.249	1.054	-0.038	274.6	25	-5.143	-1.73797	0.133841	230	-31.02	0.376	1.054	-0.327	277.3	25	#REF!	#REF!	#REF!
229	-3.82	0.438	1.054	-0.04	277.7	25.01	-5.226	-1.76602	0.174589	229	-34.468	0.31	1.054	-0.363	280.6	25	#REF!	#REF!	#REF!
228	-4.249	0.376	1.054	-0.045	280.9	25	-5.625	-1.90085	0.156034	228	-37.881	0.312	1.054	-0.399	283.8	25	#REF!	#REF!	#REF!
227	-4.241	0.337	1.054	-0.045	283.9	24.99	-5.682	-1.92011	0.148711	227	-40.717	0.324	1.054	-0.429	286.7	25.01	#REF!	#REF!	#REF!
226	-4.589	0.452	1.054	-0.048	287.2	25	-6.083	-2.05562	0.175875	226	-43.081	0.42	1.054	-0.454	289.4	24.99	#REF!	#REF!	#REF!
225	-4.653	0.437	1.054	-0.049	290.1	25	-6.016	-2.03298	0.185051	225	-44.826	0.335	1.054	-0.472	292.1	25	#REF!	#REF!	#REF!
224	-4.814	0.399	1.054	-0.051	293.1	25	-6.081	-2.05495	0.158401	224	-46.328	0.374	1.054	-0.488	295.2	25.01	#REF!	#REF!	#REF!
223	-4.988	0.356	1.054	-0.053	295.9	25.01	-6.174	-2.08637	0.147981	223	-47.169	0.382	1.054	-0.497	298.2	24.98	#REF!	#REF!	#REF!
222	-5.199	0.4	1.054	-0.055	299.1	25	-6.48	-2.18978	0.179167	222	-47.99	0.507	1.054	-0.506	301.2	25	#REF!	#REF!	#REF!
221	-5.351	0.471	1.054	-0.056	302.5	25.01	-6.565	-2.21851	0.19148	221	-48.243	0.368	1.054	-0.508	304.2	25	#REF!	#REF!	#REF!
220	-5.351	0.455	1.054	-0.056	305.9	25	-6.432	-2.17356	0.189347	220	-47.948	0.302	1.054	-0.505	307.4	24.99	#REF!	#REF!	#REF!
219	-5.529	0.431	1.054	-0.058	309.6	25.01	-6.474	-2.18775	0.173868	219	-47.592	0.58	1.054	-0.501	310.9	25.01	#REF!	#REF!	#REF!
218	-5.757	0.475	1.054	-0.061	312.9	25.01	-6.798	-2.29724	0.185308	218	-47.252	0.585	1.054	-0.498	314.2	25.01	#REF!	#REF!	#REF!
217	-6.275	0.439	1.054	-0.066	316.5	25	-7.116	-2.4047	0.187228	217	-46.845	0.487	1.054	-0.494	317.6	25.01	#REF!	#REF!	#REF!
216	-6.695	0.393	1.054	-0.071	320.4	24.99	-7.663	-2.58955	0.185206	216	-46.419	0.536	1.054	-0.489	320.9	25.01	#REF!	#REF!	#REF!
215	-7.52	0.614	1.054	-0.079	324.5	25	-8.418	-2.84469	0.226392	215	-46.275	0.566	1.053	-0.488	324.4	25.01	#REF!	#REF!	#REF!
214	-8.122	0.466	1.053	-0.086	328.8	25	-8.909	-3.01061	0.187103	214	-46.952	0.372	1.053	-0.495	328.6	24.99	#REF!	#REF!	#REF!
213	-9.468	0.709	1.053	-0.1	334.2	25	-10.509	-3.5513	0.274101	213	-47.855	0.545	1.053	-0.504	333.3	25	#REF!	#REF!	#REF!
212	-10.722	0.688	1.053	-0.113	339.7	24.99	-11.599	-3.91964	0.284068	212	-49.32	0.644	1.053	-0.519	338.2	25.01	#REF!	#REF!	#REF!
211	-12.571	0.616	1.053	-0.132	345.8	25	-13.304	-4.49581	0.231096	211	-50.909	0.614	1.053	-0.536	344	25	#REF!	#REF!	#REF!
210	-15.209	0.8	1.053	-0.16	353.3	24.99	-16.039	-5.42005	0.315969	210	-52.516	0.634	1.053	-0.553	350.8	25	#REF!	#REF!	#REF!
209	-17.815	0.824	1.053	-0.188	362.4	25.01	-18.686	-6.31454	0.30414	209	-54.257	0.709	1.053	-0.571	358.7	25	#REF!	#REF!	#REF!
208	-21.152	1.023	1.053	-0.223	372.9	24.99	-22.162	-7.48919	0.365814	208	-54.695	0.932	1.053	-0.576	368	25	#REF!	#REF!	#REF!
207	-24.763	0.731	1.053	-0.261	385.4	25.01	-25.712	-8.68883	0.274027	207	-53.073	0.783	1.053	-0.559	378.8	25	#REF!	#REF!	#REF!
206	-28.599	1.425	1.052	-0.301	399.5	25	-29.636	-10.0149	0.491086	206	-49.589	1.152	1.052	-0.522	391	25.01	#REF!	#REF!	#REF!
205	-32.128	1.466	1.052	-0.338	416.7	25	-33.201	-11.2196	0.510203	205	-43.323	0.929	1.052	-0.456	405.4	24.99	#REF!	#REF!	#REF!
204	-36.701	1.223	1.052	-0.386	436.6	25.01	-37.935	-12.8193	0.431301	204	-34.989	1.382	1.052	-0.368	422.4	24.99	#REF!	#REF!	#REF!
203	-39.489	1.355	1.051	-0.415	460.4	25	-40.814	-13.7922	0.485663	203	-25.19	1.661	1.052	-0.265	442.6	25.01	#REF!	#REF!	#REF!
202	-44.856	1.778	1.051	-0.471	488	25	-46.141	-15.5924	0.618319	202	-13.767	1.791	1.051	-0.145	465.6	24.99	#REF!	#REF!	#REF!
201	-46.763	2.612	1.05	-0.491	518.3	25	-48.285	-16.3169	0.892656	201	-1.598	2.467	1.051	-0.017	491.7	25	#REF!	#REF!	#REF!
200	-50.036	3.438	1.05	-0.525	552.5	25.01	-51.507	-17.4057	1.16956	200	11.588	2.734	1.05	0.122	519.7	24.98	#REF!	#REF!	#REF!
199	-50.081	4.152	1.049	-0.525	590.3	24.99	-51.839	-17.5179	1.40772	199	26.319	4.044	1.05	0.276	550.9	25.01	#REF!	#REF!	#REF!
198	-51.505	6.578	1.048	-0.54	630.9	25	-53.389	-18.0417	2.22613	198	41.992	5.583	1.049	0.441	584.1	25.01	#REF!	#REF!	#REF!
197	-47.666	8.169	1.048	-0.499	671.5	25.01	-49.586	-16.7566	2.76412	197	57.283	5.689	1.049	0.601	618.2	24.99	#REF!	#REF!	#REF!
196	-47.138	14.287	1.047	-0.494	709.2	25	-49.029	-16.5683	4.83035	196	70.617	6.847	1.048	0.74	651.9	24.99	#REF!	#REF!	#REF!
195	-46.189	14.048	1.047	-0.483	741.6	24.98	-48.377	-16.348	4.74876	195	81.11	10.556	1.048	0.85	683.3	25	#REF!	#REF!	#REF!
194	-27.929	18.764	1.046	-0.292	769.1	25	-30.474	-10.2981	6.34239	194	85.823	11.68	1.047	0.899	709.5	25	#REF!	#REF!	#REF!
193	-40.385	25.341	1.046	-0.422	792.9	25	-42.952	-14.5147	8.56541	193	97.585	11.16	1.047	1.022	731.8	25	#REF!	#REF!	#REF!
192	-25.8	30.007	1.046	-0.27	811.1	24.98	-28.563	-9.65227	10.1415	192	88.607	17.419	1.047	0.927	749.4	25	#REF!	#REF!	#REF!
191	-20.351	34.222	1.045	-0.213	826.5	25.01	-23.43	-7.91768	11.5655	191	90.193	16.762	1.046	0.944	764.2	25	#REF!	#REF!	#REF!
190	-10.932	37.063	1.045	-0.114	827.3	24.99	-14.463	-4.88747	12.5263	190	79.027	29.286	1.046	0.827	777.3	25.01	#REF!	#REF!	#REF!
Stf2p alone										Stf2p DMPG
X	CD_Signal	Error	Current	Delta_Signal	CD_Dynode	Jacket_Temp.	Blanked	MMRE	error	X	CD_Signal	Error	Current	Delta_Signal	CD_Dynode	Jacket_Temp.	Blanked	MMRE	error
250	1.334	0.213	1.055	0.014	248.1	24.99	#REF!	#REF!	#REF!	250	1.383	0.253	1.055	0.015	247.7	25.01	#REF!	#REF!	#REF!
249	1.199	0.187	1.055	0.013	248.5	25.01	#REF!	#REF!	#REF!	249	1.305	0.192	1.055	0.014	248.3	25.01	#REF!	#REF!	#REF!
248	1.271	0.22	1.055	0.013	249.4	25	#REF!	#REF!	#REF!	248	1.201	0.226	1.055	0.013	249	25	#REF!	#REF!	#REF!
247	1.072	0.276	1.055	0.011	250.1	25	#REF!	#REF!	#REF!	247	1.011	0.169	1.055	0.011	249.7	25.01	#REF!	#REF!	#REF!
246	0.976	0.205	1.055	0.01	250.5	24.98	#REF!	#REF!	#REF!	246	0.845	0.162	1.055	0.009	250.3	25.01	#REF!	#REF!	#REF!
245	0.915	0.2	1.055	0.01	251.4	25.01	#REF!	#REF!	#REF!	245	0.845	0.179	1.055	0.009	251.1	24.99	#REF!	#REF!	#REF!
244	0.863	0.231	1.055	0.009	251.8	25	#REF!	#REF!	#REF!	244	0.69	0.185	1.055	0.007	251.7	25	#REF!	#REF!	#REF!
243	0.783	0.278	1.055	0.008	252.6	25	#REF!	#REF!	#REF!	243	0.478	0.227	1.055	0.005	252.3	25	#REF!	#REF!	#REF!
242	0.62	0.245	1.055	0.007	253.7	24.99	#REF!	#REF!	#REF!	242	0.178	0.243	1.055	0.002	253.3	24.99	#REF!	#REF!	#REF!
241	0.411	0.289	1.055	0.004	254.3	25	#REF!	#REF!	#REF!	241	0.015	0.292	1.055	0	254.1	25	#REF!	#REF!	#REF!
240	0.269	0.188	1.055	0.003	255.3	25	#REF!	#REF!	#REF!	240	-0.395	0.245	1.055	-0.004	255.2	24.99	#REF!	#REF!	#REF!
239	0.11	0.23	1.055	0.001	256.7	24.99	#REF!	#REF!	#REF!	239	-0.582	0.3	1.055	-0.006	256.7	24.99	#REF!	#REF!	#REF!
238	-0.03	0.183	1.055	0	257.8	24.99	#REF!	#REF!	#REF!	238	-0.949	0.291	1.055	-0.01	257.8	25	#REF!	#REF!	#REF!
237	-0.386	0.268	1.055	-0.004	259.1	25.01	#REF!	#REF!	#REF!	237	-1.383	0.261	1.055	-0.015	259.1	24.99	#REF!	#REF!	#REF!
236	-0.56	0.205	1.055	-0.006	260.7	24.99	#REF!	#REF!	#REF!	236	-1.775	0.242	1.055	-0.019	261.2	24.98	#REF!	#REF!	#REF!
235	-0.88	0.269	1.054	-0.009	262.4	25.01	#REF!	#REF!	#REF!	235	-2.083	0.248	1.054	-0.022	262.8	24.99	#REF!	#REF!	#REF!
234	-1.167	0.211	1.054	-0.012	264.1	24.99	#REF!	#REF!	#REF!	234	-2.752	0.254	1.054	-0.029	265.1	25	#REF!	#REF!	#REF!
233	-1.461	0.22	1.054	-0.015	266.4	25	#REF!	#REF!	#REF!	233	-3.074	0.325	1.054	-0.032	267.4	24.99	#REF!	#REF!	#REF!
232	-1.457	0.368	1.054	-0.015	268.5	24.99	#REF!	#REF!	#REF!	232	-3.571	0.278	1.054	-0.038	270.1	24.99	#REF!	#REF!	#REF!
231	-1.938	0.31	1.054	-0.02	271.2	25	#REF!	#REF!	#REF!	231	-4.035	0.346	1.054	-0.043	273.2	24.99	#REF!	#REF!	#REF!
230	-2.191	0.29	1.054	-0.023	273.9	25	#REF!	#REF!	#REF!	230	-4.484	0.275	1.054	-0.047	276	24.98	#REF!	#REF!	#REF!
229	-2.346	0.281	1.054	-0.025	276.6	25.01	#REF!	#REF!	#REF!	229	-5.039	0.241	1.054	-0.053	279	25	#REF!	#REF!	#REF!
228	-2.657	0.279	1.054	-0.028	280.1	25	#REF!	#REF!	#REF!	228	-5.574	0.285	1.054	-0.059	282.4	25	#REF!	#REF!	#REF!
227	-2.845	0.328	1.054	-0.03	283	25.01	#REF!	#REF!	#REF!	227	-5.778	0.342	1.054	-0.061	285.3	25.01	#REF!	#REF!	#REF!
226	-2.978	0.335	1.054	-0.031	285.9	25	#REF!	#REF!	#REF!	226	-6.219	0.337	1.054	-0.066	288	24.99	#REF!	#REF!	#REF!
225	-2.945	0.419	1.054	-0.031	289	24.98	#REF!	#REF!	#REF!	225	-6.461	0.381	1.054	-0.068	290.7	24.99	#REF!	#REF!	#REF!
224	-3.239	0.34	1.054	-0.034	291.6	24.99	#REF!	#REF!	#REF!	224	-6.524	0.393	1.054	-0.069	293.5	25.01	#REF!	#REF!	#REF!
223	-3.41	0.381	1.054	-0.036	294.5	25	#REF!	#REF!	#REF!	223	-6.768	0.524	1.054	-0.071	296.3	24.99	#REF!	#REF!	#REF!
222	-3.4	0.318	1.054	-0.036	297.6	24.99	#REF!	#REF!	#REF!	222	-6.831	0.438	1.054	-0.072	298.9	25	#REF!	#REF!	#REF!
221	-3.763	0.337	1.054	-0.04	300.3	24.99	#REF!	#REF!	#REF!	221	-6.882	0.345	1.054	-0.073	301.6	24.99	#REF!	#REF!	#REF!
220	-3.819	0.505	1.054	-0.04	303	25	#REF!	#REF!	#REF!	220	-7.204	0.458	1.054	-0.076	304.2	24.99	#REF!	#REF!	#REF!
219	-4.059	0.491	1.054	-0.043	306.2	24.99	#REF!	#REF!	#REF!	219	-7.381	0.438	1.054	-0.078	306.7	25.01	#REF!	#REF!	#REF!
218	-4.301	0.482	1.054	-0.045	308.8	25	#REF!	#REF!	#REF!	218	-6.972	0.453	1.054	-0.073	309.1	25	#REF!	#REF!	#REF!
217	-4.49	0.425	1.054	-0.047	311.5	25	#REF!	#REF!	#REF!	217	-7.334	0.504	1.054	-0.077	311.7	25.01	#REF!	#REF!	#REF!
216	-4.826	0.606	1.054	-0.051	314.4	24.99	#REF!	#REF!	#REF!	216	-7.735	0.542	1.054	-0.082	314	25.01	#REF!	#REF!	#REF!
215	-5.296	0.476	1.054	-0.056	317.1	24.99	#REF!	#REF!	#REF!	215	-8.073	0.535	1.054	-0.085	317	25	#REF!	#REF!	#REF!
214	-5.778	0.509	1.054	-0.061	319.7	25	#REF!	#REF!	#REF!	214	-8.451	0.531	1.054	-0.089	319.5	25	#REF!	#REF!	#REF!
213	-6.567	0.508	1.054	-0.069	322.8	25	#REF!	#REF!	#REF!	213	-8.985	0.534	1.054	-0.095	322.4	25	#REF!	#REF!	#REF!
212	-7.309	0.52	1.053	-0.077	325.9	25	#REF!	#REF!	#REF!	212	-9.922	0.66	1.054	-0.105	325.3	24.99	#REF!	#REF!	#REF!
211	-7.941	0.595	1.053	-0.084	329.5	24.98	#REF!	#REF!	#REF!	211	-10.563	0.611	1.053	-0.111	328.5	24.99	#REF!	#REF!	#REF!
210	-8.691	0.505	1.053	-0.092	333.5	24.98	#REF!	#REF!	#REF!	210	-11.482	0.649	1.053	-0.121	332	25.01	#REF!	#REF!	#REF!
209	-10.016	0.56	1.053	-0.105	338.2	24.99	#REF!	#REF!	#REF!	209	-12.252	0.642	1.053	-0.129	336.2	25	#REF!	#REF!	#REF!
208	-11.2	0.473	1.053	-0.118	343.4	25	#REF!	#REF!	#REF!	208	-13.528	0.721	1.053	-0.142	341.2	25	#REF!	#REF!	#REF!
207	-12.321	0.705	1.053	-0.13	349.6	25	#REF!	#REF!	#REF!	207	-14.362	0.661	1.053	-0.151	346.8	25	#REF!	#REF!	#REF!
206	-13.202	0.833	1.053	-0.139	356.2	25.01	#REF!	#REF!	#REF!	206	-14.762	0.934	1.053	-0.155	353.1	24.99	#REF!	#REF!	#REF!
205	-14.567	0.833	1.053	-0.153	364.3	24.99	#REF!	#REF!	#REF!	205	-14.37	1.009	1.053	-0.151	360	24.98	#REF!	#REF!	#REF!
204	-15.25	0.739	1.053	-0.161	372.7	25.01	#REF!	#REF!	#REF!	204	-14.338	0.889	1.053	-0.151	368.1	25	#REF!	#REF!	#REF!
203	-16.1	0.952	1.053	-0.169	382.6	25.01	#REF!	#REF!	#REF!	203	-13.849	1.116	1.053	-0.146	377.5	25	#REF!	#REF!	#REF!
202	-16.242	1.064	1.052	-0.171	394	25.01	#REF!	#REF!	#REF!	202	-12.925	1.064	1.052	-0.136	387.9	24.99	#REF!	#REF!	#REF!
201	-16.117	0.951	1.052	-0.17	406.3	25	#REF!	#REF!	#REF!	201	-11.199	1.145	1.052	-0.118	398.9	25	#REF!	#REF!	#REF!
200	-17.139	1.563	1.052	-0.18	419	25	#REF!	#REF!	#REF!	200	-9.048	1.266	1.052	-0.095	411.4	25	#REF!	#REF!	#REF!
199	-15.937	1.344	1.052	-0.168	433.8	25	#REF!	#REF!	#REF!	199	-5.481	1.483	1.052	-0.058	424.6	24.99	#REF!	#REF!	#REF!
198	-15.824	1.578	1.051	-0.166	449.7	25	#REF!	#REF!	#REF!	198	-2.711	1.853	1.052	-0.029	439.6	25.01	#REF!	#REF!	#REF!
197	-13.166	1.798	1.051	-0.138	466.8	25.01	#REF!	#REF!	#REF!	197	0.297	1.895	1.051	0.003	456.5	25	#REF!	#REF!	#REF!
196	-11.717	1.983	1.051	-0.123	484.6	25	#REF!	#REF!	#REF!	196	4.346	1.823	1.051	0.046	474.2	25	#REF!	#REF!	#REF!
195	-9.492	2.011	1.051	-0.1	502.7	24.99	#REF!	#REF!	#REF!	195	6.096	2.51	1.051	0.064	492.2	25	#REF!	#REF!	#REF!
194	-7.403	2.424	1.05	-0.078	521.2	25	#REF!	#REF!	#REF!	194	8.605	3.049	1.05	0.09	509.7	25	#REF!	#REF!	#REF!
193	-5.326	4.044	1.05	-0.056	540.9	25.01	#REF!	#REF!	#REF!	193	10.81	2.691	1.05	0.114	528	24.99	#REF!	#REF!	#REF!
192	-3.571	4.838	1.05	-0.037	560.7	25.01	#REF!	#REF!	#REF!	192	11.962	3.143	1.05	0.126	546.6	25	#REF!	#REF!	#REF!
191	-1.509	5.343	1.049	-0.016	583.2	24.99	#REF!	#REF!	#REF!	191	14.308	4.413	1.049	0.15	568.6	24.98	#REF!	#REF!	#REF!
190	0.453	6.047	1.049	0.005	609.8	25.01	#REF!	#REF!	#REF!	190	13.501	4.674	1.049	0.142	594.8	25.01	#REF!	#REF!	#REF!
