# Supplementary material for: Synergy between the small intrinsically disordered protein Hsp12 and trehalose sustain viability after severe desiccation
Source: eLife journal article supplement (doi:10.7554/elife.38337), 2018-07-16
Supplement: supp [file elife-38337-supp-v1.zip]

**Table Supplement 2. Strain Table**

|                            |                                                                                                                                                                                                     |                                                                                                               |
|----------------------------|-----------------------------------------------------------------------------------------------------------------------------------------------------------------------------------------------------|---------------------------------------------------------------------------------------------------------------|
| <b>Stain List</b>          |                                                                                                                                                                                                     |                                                                                                               |
| BY4742                     | Wild type                                                                                                                                                                                           | MAT $\alpha$ his3 $\Delta$ 1 leu2 $\Delta$ 0 lys2 $\Delta$ 0 ura3 $\Delta$ 0                                  |
| HTY104                     | <i>tps1</i> $\Delta$                                                                                                                                                                                | MAT $\alpha$ his3 $\Delta$ 1 leu2 $\Delta$ 0 lys2 $\Delta$ 0 ura3 $\Delta$ 0 tps1::G418                       |
| HTY11                      | <i>hsp12</i> $\Delta$                                                                                                                                                                               | MAT $\alpha$ his3 $\Delta$ 1 leu2 $\Delta$ 0 lys2 $\Delta$ 0 ura3 $\Delta$ 0 hsp12::G418                      |
| HTY176                     | <i>tps1</i> $\Delta$ <i>hsp12</i> $\Delta$                                                                                                                                                          | MAT $\alpha$ his3 $\Delta$ 1 leu2 $\Delta$ 0 lys2 $\Delta$ 0 ura3 $\Delta$ 0 tps1::HYG hsp12::G418            |
| HTY14                      | <i>stf2</i> $\Delta$                                                                                                                                                                                | MAT $\alpha$ his3 $\Delta$ 1 leu2 $\Delta$ 0 lys2 $\Delta$ 0 ura3 $\Delta$ 0 stf2::G418                       |
| HTY179                     | <i>tps1</i> $\Delta$ <i>stf2</i> $\Delta$                                                                                                                                                           | MAT $\alpha$ his3 $\Delta$ 1 leu2 $\Delta$ 0 lys2 $\Delta$ 0 ura3 $\Delta$ 0 tps1::HYG stf2::G418             |
| HTY195                     | 8X $\Delta$ :<br><i>hsp12</i> $\Delta$ <i>gre1</i> $\Delta$ <i>sip18</i> $\Delta$ <i>stf2</i> $\Delta$ <i>nop6</i> $\Delta$ <i>ybr016w</i> $\Delta$ <i>yjl144w</i> $\Delta$ <i>ynl190w</i> $\Delta$ | hsp12::GFP, gre1::GFP, sip18::GFP, stf2::GFP, ybr016w::GFP, yjl144w::GFP, ynl190w::GFP, nop6::HYG             |
| <b>Transporter Strains</b> |                                                                                                                                                                                                     |                                                                                                               |
| HTY121                     | <i>nth1</i> $\Delta$                                                                                                                                                                                | MAT $\alpha$ his3 $\Delta$ 1 leu2 $\Delta$ 0 lys2 $\Delta$ 0 ura3 $\Delta$ 0 nth1::G418                       |
| HTY164                     | <i>nth1</i> $\Delta$ AGT1                                                                                                                                                                           | MAT $\alpha$ his3 $\Delta$ 1 leu2 $\Delta$ 0 lys2 $\Delta$ 0 ura3 $\Delta$ 0 nth1::G418 can1::AGT1            |
| <b>Prion Strains</b>       |                                                                                                                                                                                                     |                                                                                                               |
| HTY92                      | [PSI <sup>+</sup> ]                                                                                                                                                                                 | Mat $\alpha$ ade1-14 trp1-289 his3 $\Delta$ -200 ura3-52 leu2-3,112 (ADE <sup>+</sup> )                       |
| HTY187                     | [PSI <sup>+</sup> ] <i>hsp12</i> $\Delta$                                                                                                                                                           | Mat $\alpha$ ade1-14 trp1-289 his3 $\Delta$ -200 ura3-52 leu2-3,112 (ADE <sup>+</sup> ) hsp12::HYG            |
| HTY120                     | [PSI <sup>+</sup> ] <i>tps1</i> $\Delta$                                                                                                                                                            | Mat $\alpha$ ade1-14 trp1-289 his3 $\Delta$ -200 ura3-52 leu2-3,112 (ADE <sup>+</sup> ) tps1::G418            |
| HTY188                     | [PSI <sup>+</sup> ] <i>tps1</i> $\Delta$ <i>hsp12</i> $\Delta$                                                                                                                                      | Mat $\alpha$ ade1-14 trp1-289 his3 $\Delta$ -200 ura3-52 leu2-3,112 (ADE <sup>+</sup> ) tps1::G418 hsp12::HYG |
| HTY82                      | [GAR <sup>+</sup> ]                                                                                                                                                                                 | Mat a can1-100 his3-11,15 leu2-2,112 trp1-1 ura3-1, ade2-1 (GlucosamineR)                                     |
| HTY189                     | [GAR <sup>+</sup> ] <i>hsp12</i> $\Delta$                                                                                                                                                           | Mat a can1-100 his3-11,15 leu2-2,112 trp1-1 ura3-1, ade2-1 (GlucosamineR) hsp12::HYG                          |
| HTY115                     | [GAR <sup>+</sup> ] <i>tps1</i> $\Delta$                                                                                                                                                            | Mat a can1-100 his3-11,15 leu2-2,112 trp1-1 ura3-1, ade2-1 (GlucosamineR) tps1::G418                          |
| HTY190                     | [GAR <sup>+</sup> ] <i>tps1</i> $\Delta$ <i>hsp12</i> $\Delta$                                                                                                                                      | Mat a can1-100 his3-11,15 leu2-2,112 trp1-1 ura3-1, ade2-1 (GlucosamineR) tps1::NAT hsp12::HYG                |
