# Supplementary material for: Synergy between the small intrinsically disordered protein Hsp12 and trehalose sustain viability after severe desiccation
Source: eLife journal article supplement (doi:10.7554/elife.38337), 2018-07-16

**Figure 4B – source data**

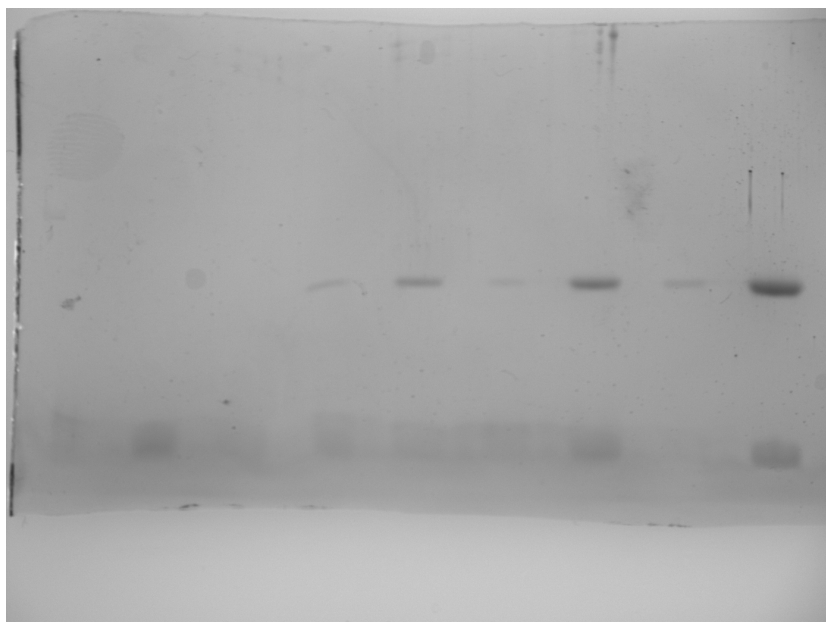

Supplement: supp [file elife-38337-supp-v1.zip]
