# Supplementary material for: Synergy between the small intrinsically disordered protein Hsp12 and trehalose sustain viability after severe desiccation
Source: eLife journal article supplement (doi:10.7554/elife.38337), 2018-07-16
Supplement: supp [file elife-38337-supp-v1.zip]

Table Supplement 1. Synthetic Genetic Array Desiccation Screen – *tps1*Δ

**A.**

|                                                                    | Number of Hits | Total Genes |
|--------------------------------------------------------------------|----------------|-------------|
| Synthetic Lethal with <i>tps1</i> Δ                                | 178            | 4700        |
| Desiccation Sensitive with <i>tps1</i> Δ                           | 174            | 4700        |
| Desiccation Tolerant suppressors of <i>tps1</i> Δ after 30 Day Dry | 121            | 4700        |

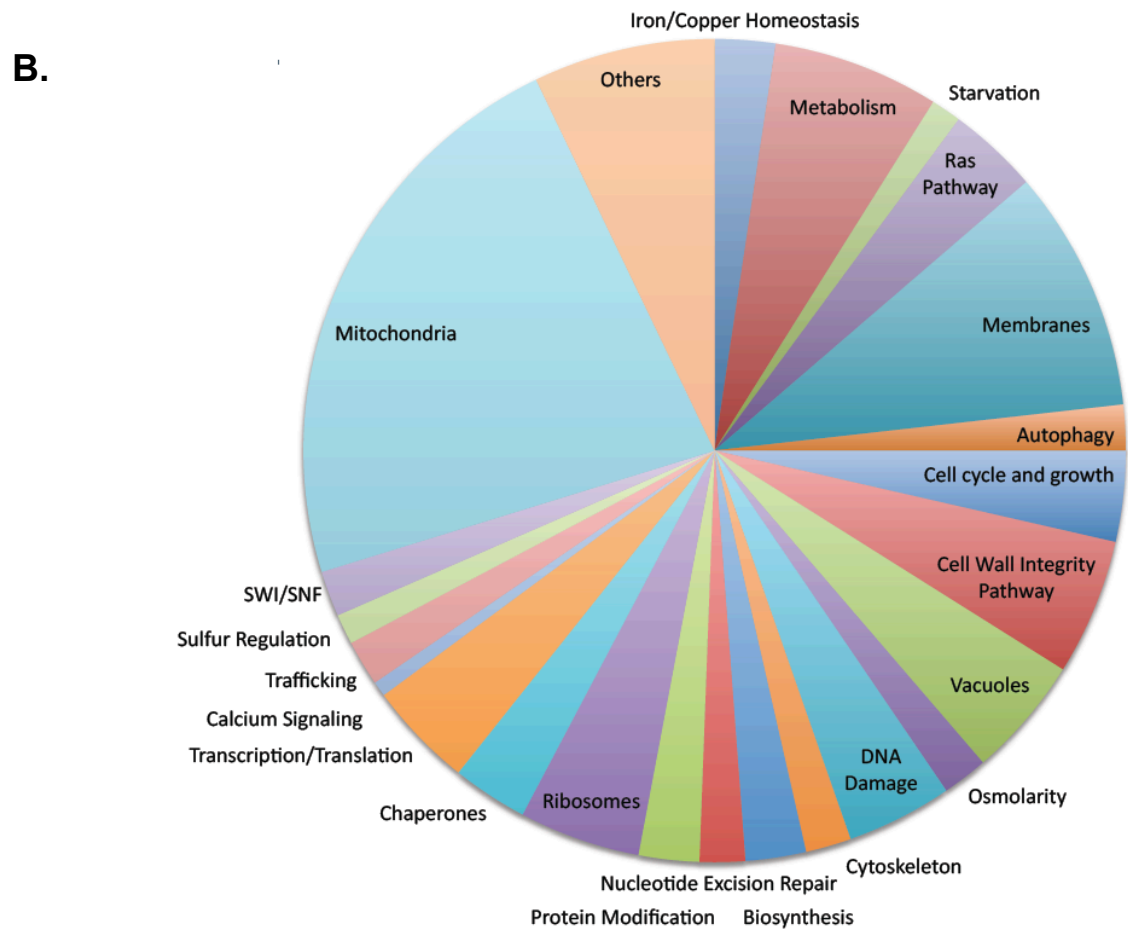

## 1. Synthetic Lethality with *tps1* $\Delta$ - SGA

| Strain    | Standard Name | Strain    | Standard Name | Strain    | Standard Name | Strain  | Standard Name |
|-----------|---------------|-----------|---------------|-----------|---------------|---------|---------------|
| YBR278W   | <i>DPB3</i>   | YMR154C   | RIM13         | YML073C   | YL16A         | YDR419W | <i>RAD30</i>  |
| YBR279W   | <i>PAF1</i>   | YBR191W   | RPL21A        | YNL055C   | POR1          | YEL024W | <i>RIP1</i>   |
| YBR282W   | <i>MRPL27</i> | YLR370C   | ARC18         | YNL284C   | MRPL10        | YEL027W | <i>VMA3</i>   |
| YCR020W-B | <i>HTL1</i>   | YLR382C   | NAM2          | YPR133W-A | TOM5          | YEL029C | <i>BUD16</i>  |
| YCR024C   | <i>SLM5</i>   | YJR118C   | ILM1          | YAL044C   | GCV3          | YEL043W |               |
| YCR044C   | <i>PER1</i>   | YJR139C   | HOM6          | YAL039C   | CYC3          | YEL044W | <i>IES6</i>   |
| YCR063W   | <i>BUD31</i>  | YJL006C   | CTK2          | YAL013W   | DEP1          | YEL051W | <i>VMA8</i>   |
| YCR071C   | <i>IMG2</i>   | YJR030C   | RBH2          | YAL002W   | VPS8          | YER050C | <i>RSM18</i>  |
| YCR081W   | <i>SRB8</i>   | YJR033C   | RAV1          | YBL016W   | <i>FUS3</i>   | YER044C | <i>BUD18</i>  |
| YDR363W-A | <i>SEM1</i>   | YJR035W   | RAD26         | YBL038W   | <i>MRPL16</i> | YFL036W | <i>RPO41</i>  |
| YFR040W   | <i>SAP155</i> | YJR036C   | HUL4          | YBL063W   | <i>KIP1</i>   | YFL053W | <i>DAK2</i>   |
| YGR219W   |               | YJR040W   | GEF1          | YBL066C   | <i>SEF1</i>   | YFR001W | <i>LOC1</i>   |
| YGR229C   | <i>SMI1</i>   | YJR060W   | CBF1          | YBL101C   | <i>ECM21</i>  | YFR010W | <i>UBP6</i>   |
| YGR237C   |               | YJR066W   | TOR1          | YBR015C   | <i>TTP1</i>   | YGL016W | <i>PDR6</i>   |
| YGR270W   | <i>YTA7</i>   | YJL136C   | RPS25B        | YBR042C   | <i>CST26</i>  | YGL025C | <i>PGD1</i>   |
| YGR275W   | <i>RTT102</i> | YJL165C   | HAL5          | YBR065C   | <i>ECM2</i>   | YGL058W | <i>RAD6</i>   |
| YGR285C   | <i>ZUO1</i>   | YJL175W   |               | YBR094W   | <i>PBY1</i>   | YGL124C | <i>MON1</i>   |
| YHR039C-B | <i>VMA10</i>  | YJL184W   | GON7          | YBR098W   | <i>MMS4</i>   | YGL136C | <i>MRM2</i>   |
| YKR035W-A | <i>DID2</i>   | YJL189W   | RPL39         | YBR188C   | <i>NTC20</i>  | YGL151W | <i>NUT1</i>   |
| YKR082W   | NUP133        | YFR025C   | HIS2          | YBR221C   | <i>PDB1</i>   | YGL244W | <i>RTF1</i>   |
| YLL018C-A | COX19         | YJL101C   | GSH1          | YBR262C   | <i>AIM5</i>   | YGR003W | <i>CUL3</i>   |
| YNR050C   | LYS9          | YKR085C   | MRPL20        | YCL032W   | <i>STE50</i>  | YGR020C | <i>VMA7</i>   |
| YNR068C   | BUL3          | YLR439W   | MRPL4         | YCL037C   | <i>SRO9</i>   | YGR055W | <i>MUP1</i>   |
| YER106W   | MAM1          | YLR442C   | SIR3          | YCR007C   |               | YGR101W | <i>PCP1</i>   |
| YER108C   | FLO8          | YNR052C   | POP2          | YCL039W   | <i>GID7</i>   | YGR104C | <i>SRB5</i>   |
| YER141W   | COX15         | YPL268W   | PLC1          | YCL063W   | <i>VAC17</i>  | YGR122W |               |
| YER145C   | FTR1          | YPR067W   | ISA2          | YDL033C   | <i>SLM3</i>   | YGR171C | <i>MSM1</i>   |
| YER151C   | UBP3          | YBR131W   | CCZ1          | YDL045W-A | <i>MRP10</i>  | YGR215W | <i>RSM27</i>  |
| YER154W   | OXA1          | YBR289W   | SNF5          | YDL069C   | <i>CBS1</i>   | YGR217W | <i>CCH1</i>   |
| YER161C   | SPT2          | YCR028C-A | RIM1          | YDL072C   | <i>YET3</i>   | YHL027W | <i>RIM101</i> |
| YER177W   | BMH1          | YCR046C   | IMG1          | YDL159W   | <i>STE7</i>   | YHL007C | <i>STE20</i>  |
| YMR058W   | FET3          | YCR047C   | BUD23         | YDL185W   | <i>VMA1</i>   | YHR121W | <i>LSM12</i>  |
| YMR066W   | SOV1          | YCR084C   | TUP1          | YDR027C   | <i>VPS54</i>  | YHR132C | <i>ECM14</i>  |
| YMR077C   | <i>VSP20</i>  | YNL052W   | COX5A         | YDR123C   | <i>INO2</i>   | YIL040W | <i>APQ12</i>  |
| YOL086C   | <i>ADH1</i>   | YNL073W   | MSK1          | YDR175C   | <i>RSM24</i>  | YIL148W | <i>RPL40A</i> |
| YOL115W   | TRF4          | YNL107W   | YAF9          | YDR226W   | <i>ADK1</i>   | YIL149C | <i>MLP2</i>   |
| YOL129W   | <i>VPS64</i>  | YDR512C   | EMI1          | YDR227W   | <i>SIR4</i>   | YIL153W | <i>RRD1</i>   |
| YER092W   | <i>IES5</i>   | YFL001W   | DEG1          | YDR237W   | <i>MRPL7</i>  |         |               |
| YHL025W   | SNF6          | YFL013C   | IES1          | YDR279W   | <i>RNH202</i> |         |               |
| YHR064C   | SSZ1          | YGR252W   | GCN5          | YDR293C   | <i>SSD1</i>   |         |               |
| YHR168W   | MTG2          | YGR255C   | COQ6          | YDR295C   | <i>HDA2</i>   |         |               |
| YOR096W   | RPS7A         | YGR257C   | MTM1          | YDR296W   | <i>MHR1</i>   |         |               |
| YMR097C   | MTG1          | YIR023W   | DAL81         | YDR332W   | <i>IRC3</i>   |         |               |
| YMR135C   | GID8          | YJR055W   | HIT1          | YDR335W   | <i>MSN5</i>   |         |               |
| YHR005C   | GPA1          | YNL138W   | SRV2          | YDR388W   | <i>RVS167</i> |         |               |
| YHR041C   | SRB2          | YOR270C   | VPH1          | YDR389W   | <i>SAC7</i>   |         |               |
| YHR067W   | HTD2          | YPL078C   | ATP4          | YDR405W   | <i>MRP20</i>  |         |               |

## 2. Desiccation Sensitive with *tps1* $\Delta$ - 6 Day Dry - SGA

| Strain    | Standard Name | Strain  | Standard Name | Strain  | Standard Name | Strain  | Standard Name |
|-----------|---------------|---------|---------------|---------|---------------|---------|---------------|
| YFL014W   | HSP12         | YJR052W | RAD7          | YKL137W | CMC1          | YNR002C | ATO2          |
| YBR295W   | PCA1          | YJR061W |               | YKL150W | MCR1          | YNR039C | ZRG17         |
| YBR297W   | MAL33         | YFL033C | RIM15         | YKL159C | RCN1          | YNR047W | FPK1          |
| YCR026C   | NPP1          | YAL008W | FUN14         | YKL161C | KDX1          | YOR061W | CKA2          |
| YCR027C   | RHB1          | YBL001C | ECM15         | YKL170W | MRPL38        | YOR065W | CYT1          |
| YGR256W   | GND2          | YBR019C | GAL10         | YKL171W | NNK1          | YOR086C | TCB1          |
| YIR021W   | MRS1          | YBR037C | SCO1          | YKL175W | ZRT3          | YOR107W | RGS2          |
| YIR023W   | DAL81         | YBR203W | COS111        | YKL207W | EMC3          | YOR115C | TRS33         |
| YIR031C   | DAL7          | YBR215W | HPC2          | YKR003W | OSH6          | YOR118W | RTC5          |
| YIR033W   | MGA2          | YBR227C | MCX1          | YKR055W | RHO4          | YOR149C | SMP3          |
| YIR038C   | GTT1          | YCR009C | RVS161        | YKR059W | TIF1          | YOR161C | PNS1          |
| YLR423C   | ATG17         | YDL107W | MSS2          | YLL006W | MMM1          | YOR166C | SWT1          |
| YLR425W   | TUS1/SOP10    | YDR148C | KGD2          | YLL014W | EMC6          | YOR178C | GAC1          |
| YLR447C   | VMA6          | YDR194C | MSS116        | YLL019C | KNS1          | YOR182C | RPS30B        |
| YER118C   | SSU81         | YDR197W | CBS2          | YLL026W | HSP104        | YOR191W | ULS1          |
| YER128W   | VFA1          | YDR204W | COQ4          | YLL040C | VPS13         | YOR231W | MKK1          |
| YER153C   | PET122        | YDR350C | TCM10         | YLL043W | FPS1          | YOL015W | IRC10         |
| YER155C   | BEM2          | YDR375C | BCS1          | YLL051C | FRE6          | YOL083W | ATG34         |
| YER167W   | BCK2          | YER030W | CHZ1          | YLR025W | SNF7          | YOL084W | PHM7          |
| YMR070W   | MOT3          | YFL016C | MDJ1          | YLR006C | SSK1          | YPL274W | SAM3          |
| YOL095C   | HMI1          | YGL107C | RMD9          | YLR064W | PER33         | YPL273W | SAM4          |
| YOL096C   | COQ3          | YGL115W | SNF4          | YLR079W | SIC1          | YPL249C | GYP5          |
| YER078C   | ICP55         | YGL135W | RPL1B         | YLR080W | EMP46         | YPL193W | RSA1          |
| YER008C   | SEC3          | YGL203C | KEX1          | YLR083C | EMP70         | YPL178W | CBC2          |
| YDR424C   | DYN2          | YGL213C | SKI8          | YLR093C | NYV1          | YPL105C | SYH1          |
| YER090W   | TRP2          | YGL234W | ADE5,7        | YLR114C | AVL9          | YPL096W | PNG1          |
| YEL011W   | GLC3          | YGR078C | PAC10         | YLR134W | PDC5          | YPL089C | RLM1          |
| YLR034C   | SMF3          | YGR105W | VMA21         | YLR375W | STP3          | YPL057C | SUR1          |
| YMR315W   |               | YGR183C | QCR9          | YMR035W | IMP2          | YPL049C | DIG1          |
| YMR316C-A |               | YHL038C | CBP2          | YMR256C | COX7          | YPR003C |               |
| YML095C   | RAD10         | YHL023C | NPR3          | YNL339C | YRF1-6        | YPR004C | AIM25         |
| YML108C   |               | YHR010W | RPL27A        | YNL330C | RPD3          | YPR124W | CTR1          |
| YML110C   | COQ5          | YHR011W | DIA4          | YNL329C | PEX6          | YPR194C | OPT2          |
| YMR099C   |               | YHR016C | YSC84         | YNL233W | BN14          | YJR004C | SAG1          |
| YER063W   | THO1          | YHR021C | RPS27B        | YNL229C | URE2          |         |               |
| YER066W   | RRT13         | YIL013C | PDR11         | YNL225C | CNM67         |         |               |
| YLR246W   | ERF2          | YIL162W | SUC2          | YNL218W | MGS1          |         |               |
| YLR346C   |               | YJL168C | EZL1          | YNL162W | RPL41A        |         |               |
| YPL217C   | BMS1          | YJL046W | AIM22         | YNL145W | MFA2          |         |               |
| YPL224C   | MMT2          | YKL002W | DID4          | YNL139C | THO2          |         |               |
| YCL023C   |               | YKL037W | AIM26         | YNL144C |               |         |               |
| YJR087W   |               | YKL048C | ELM1          | YNL098C | RAS2          |         |               |
| YJR134C   | SGM1          | YKL055C | OAR1          | YNL091W | NST1          |         |               |
| YML072C   | TCB3          | YKL101W | HSL1          | YNL077W | APJ1          |         |               |
| YML085C   | TUB1          | YKL134C | OCT1.         | YNL054W | VAC7          |         |               |
| YJL005W   | CYR1          | YKL146W | AVT3          | YNL001W | DOM34         |         |               |
| YJL028W   |               | YKL148C | SDH1          | YNR001C | CIT1          |         |               |

### 3. Desiccation Tolerant Suppressors of *tps1* $\Delta$ - 30 Day Dry - SGA

| Strain    | Standard Name | Strain  | Standard Name | Strain  | Standard Name |
|-----------|---------------|---------|---------------|---------|---------------|
| YER093C-A | AIM11         | YDR108W | GSG1          | YIR013C | GAT4          |
| YMR142C   | RPL14B        | YDR159W | SAC3          | YJL170C | ASG7          |
| YMR319C   | FET4          | YDR162C | NBP2          | YJL165C | HAL5          |
| YML094W   | GIM5          | YDR173C | ARG82         | YJL079C | PRY1          |
| YMR106C   | YKU80         | YDR207C | UME6          | YJL038C | LOH1          |
| YMR116C   | ASC1          | YDR231C | COX2          | YJR092W | BUD4          |
| YER031C   | YPT8          | YDR264C | AKR1          | YKL096W | CWP1          |
| YER046W   | SPO73         | YDR320C | SWA2          | YKL103C | APE1          |
| YGR204W   | ADE3          | YDR360W | OPI7          | YKL114C | APN1          |
| YHR119W   | YTX1          | YDR369C | XRS2          | YKL119C | VPH2          |
| YJR121W   | ATP2          | YDR432W | NPL3          | YKL126W | YPK1          |
| YJR140C   | HIR3          | YDR441C | APT2          | YKL127W | PGM1          |
| YAL054C   | ACS1          | YDR457W | TOM1          | YKL185W | ASH1          |
| YJR010W   | MET4          | YDR511W | ACN9          | YKL187C | FAT3          |
| YJR063W   | RPA12         | YDR524C | AGE1          | YKL197C | PEX1          |
| YJR066W   | TOR1          | YEL007W | MIT1          | YKR007W | MEH1          |
| YGR239C   | PEX21         | YEL052W | AFG1          | YLL001W | DNM1          |
| YJL137C   | GLG2          | YER005W | YND1          | YLL021W | SPA2          |
| YBR083W   | TEC1          | YFL011W | HXT10         | YLL052C | AQY2          |
| YBR084C-A | RPL19A        | YFL030W | AGX1          | YLR068W | FYV7          |
| YBR125C   | PTC4          | YFL055W | AGP3          | YLR070C | XYL2          |
| YBR168W   | PEX32         | YFL008W | SMC1          | YLR074C | BUD20         |
| YNL079C   | TPM1          | YGL006W | PMC1          | YLR121C | YPS3          |
| YNL080C   | EOS1          | YGL028C | SCW11         | YLR172C | DPH5          |
| YOR265W   | RBL2          | YGL110C | CUE3          | YLR191W | PEX13         |
| YNL059C   | ARP5          | YGL153W | PEX14         | YLR206W | ENT2          |
| YOL148C   | SPT20         | YGL216W | KIP3          | YLR216C | CPR6          |
| YAL059W   | SIM1          | YGL227W | VID30         | YLR248W | RCK2          |
| YAL035W   | FUN12         | YGL229C | SAP4          |         |               |
| YAL011W   | SWC3          | YGL236C | MTO1          |         |               |
| YBL027W   | RPL19B        | YGR007C | MUQ1          |         |               |
| YBL006C   | LDB7          | YGR016W |               |         |               |
| YBL021C   | HAP3          | YGR025W |               |         |               |
| YBL045C   | COR1          | YGR059W | SPR3          |         |               |
| YBL080C   | PET112        | YGR141W | VPS62         |         |               |
| YBL089W   | AVT5          | YGR144W | THI4          |         |               |
| YBR136W   | ESR1          | YGR157W | CHO2          |         |               |
| YBR229C   | ROT2          | YHL044W |               |         |               |
| YDL009C   |               | YHR109W | CTM1          |         |               |
| YDL021W   | GPM2          | YHR113W | APE4          |         |               |
| YDL038C   |               | YHR115C | DMA1          |         |               |
| YDL116W   | NUP84         | YHR132C | ECM14         |         |               |
| YDL137W   | ARF2          | YIL011W | TIR3          |         |               |
| YDL191W   | RPL35A        | YIL039W | TED1          |         |               |
| YDL215C   | GDH2          | YIL088C | AVT7          |         |               |
| YDR024W   | FYV1          | YIL090W | ICE2          |         |               |
| YDR025W   | RPS11A        | YIL095W | PRK1          |         |               |
