# Supplementary material for: Synergy between the small intrinsically disordered protein Hsp12 and trehalose sustain viability after severe desiccation
Source: eLife journal article supplement (doi:10.7554/elife.38337), 2018-07-16

**Figure 4C – source data**

**Hsp12 alone**

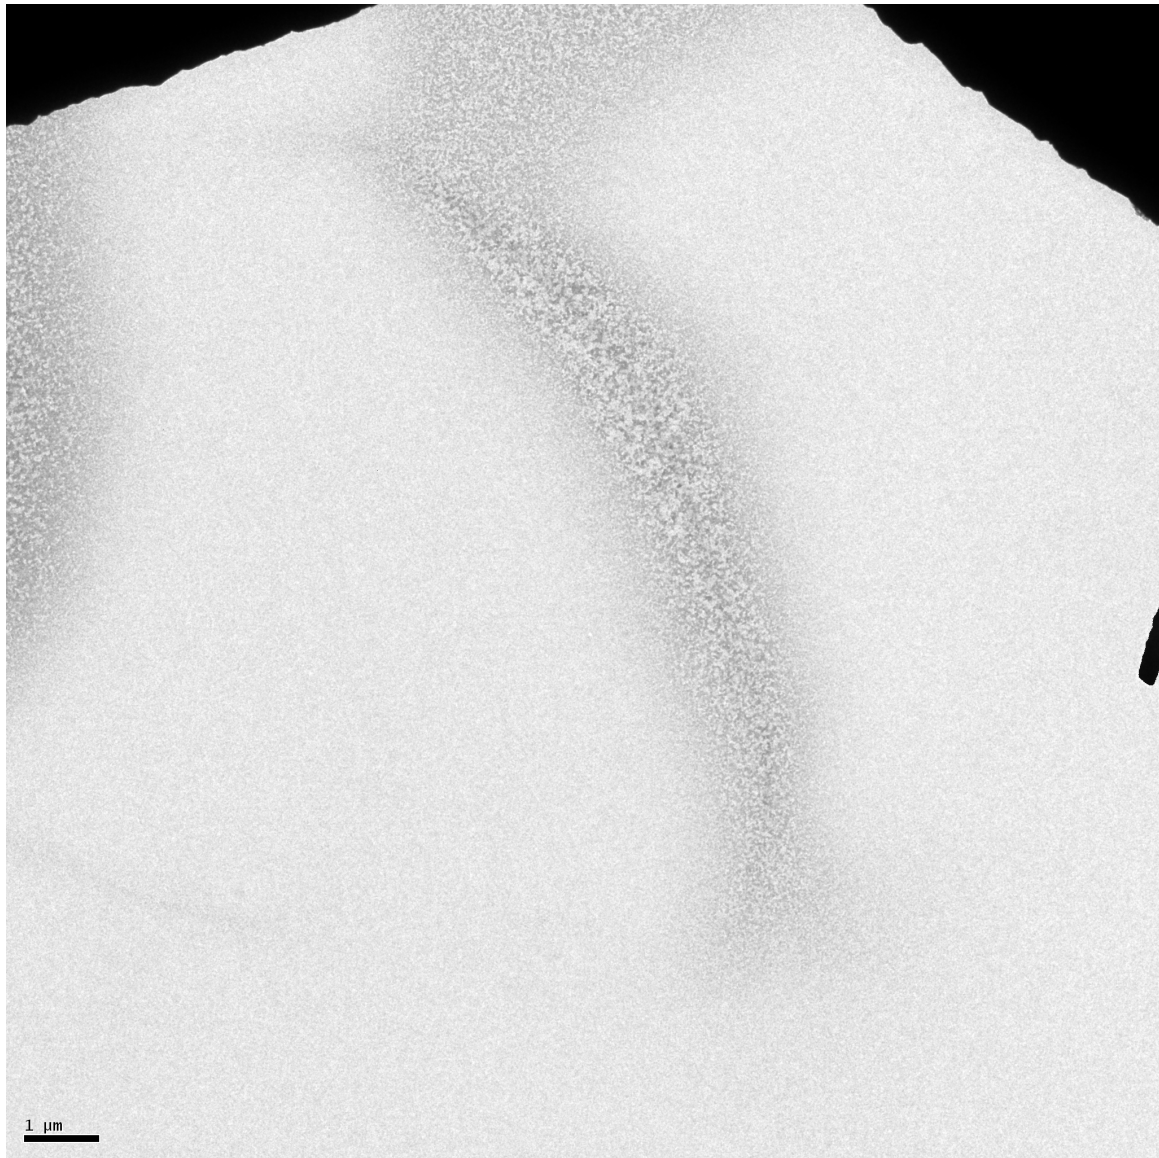

## Hsp12 alone

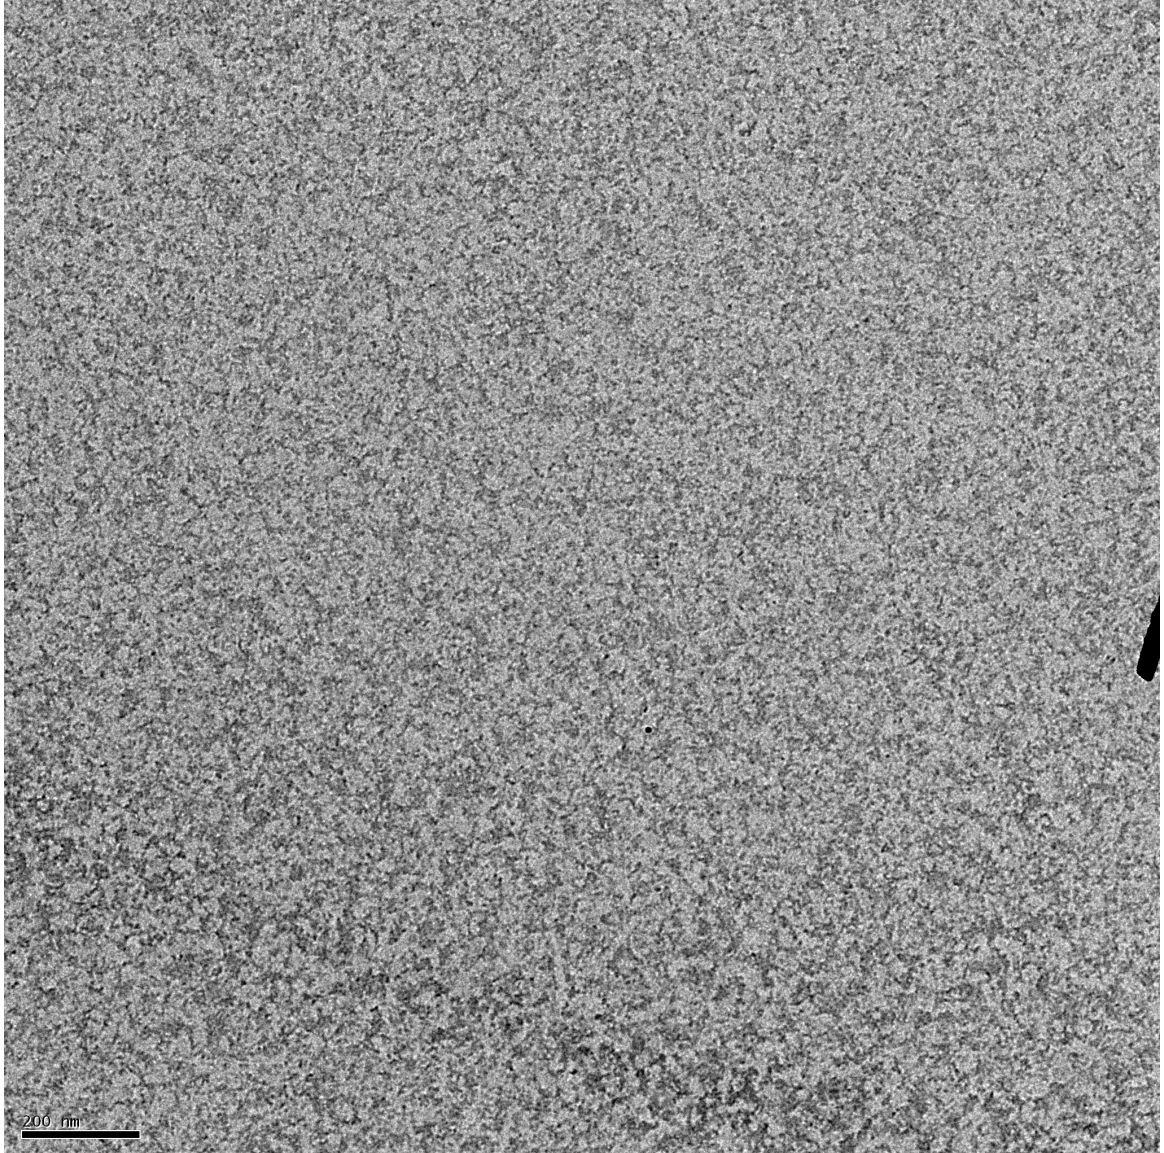

## Lipids alone

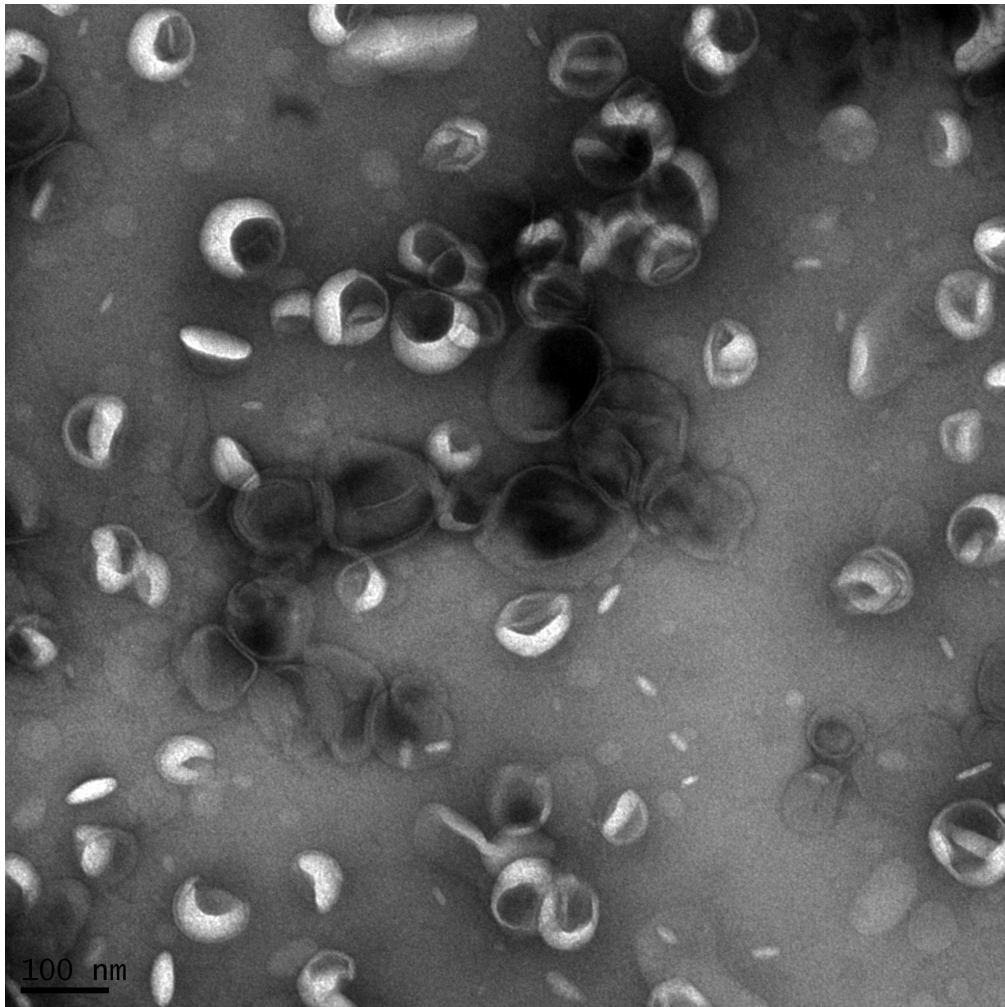

Lipids alone

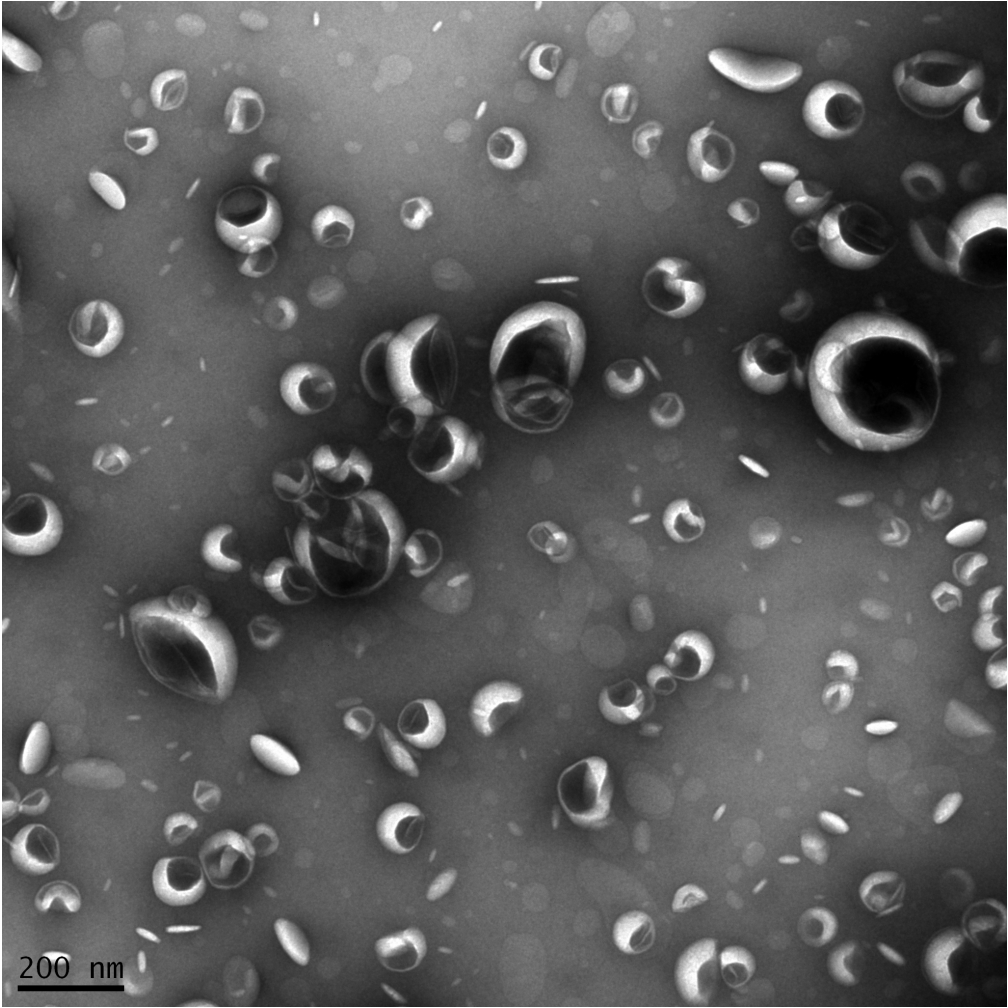

Lipids + Hsp12

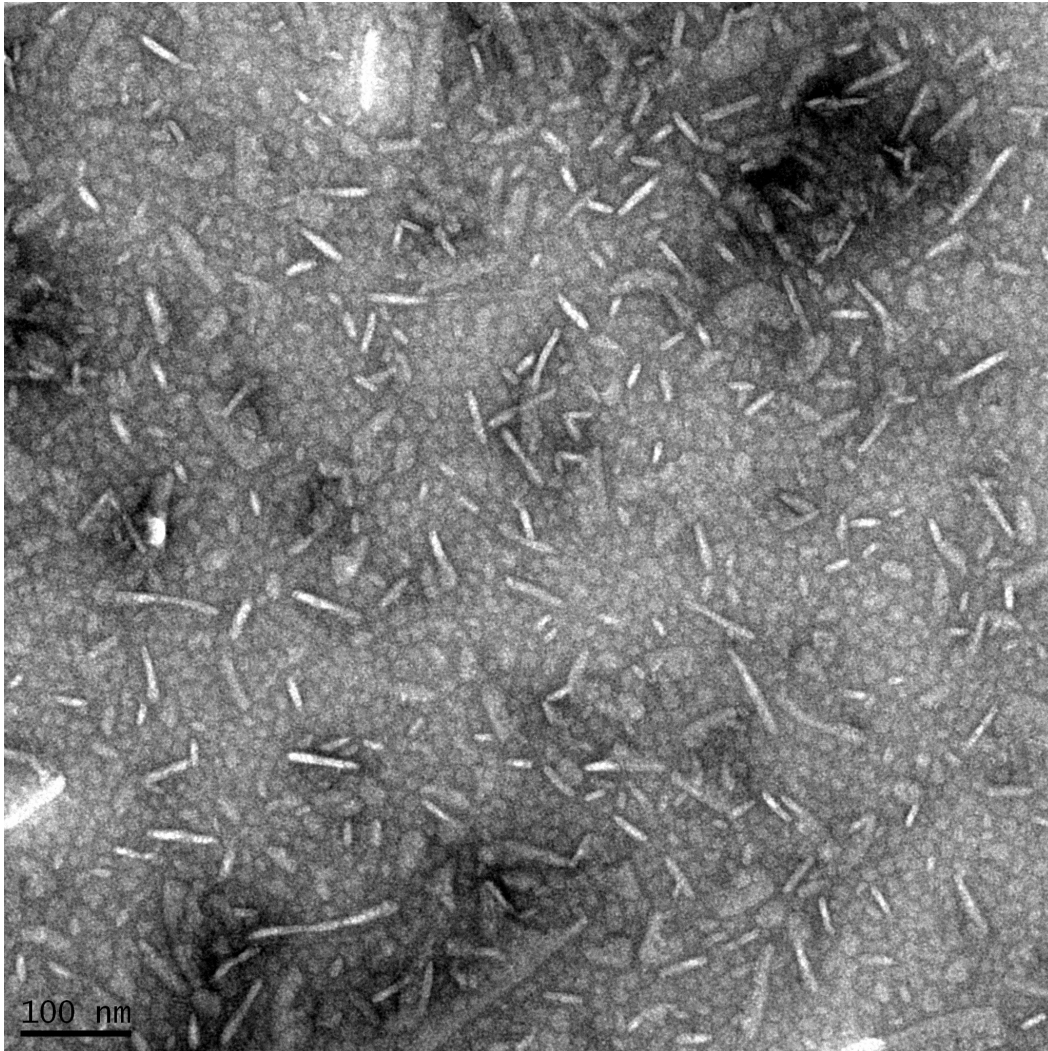

Lipids + Hsp12

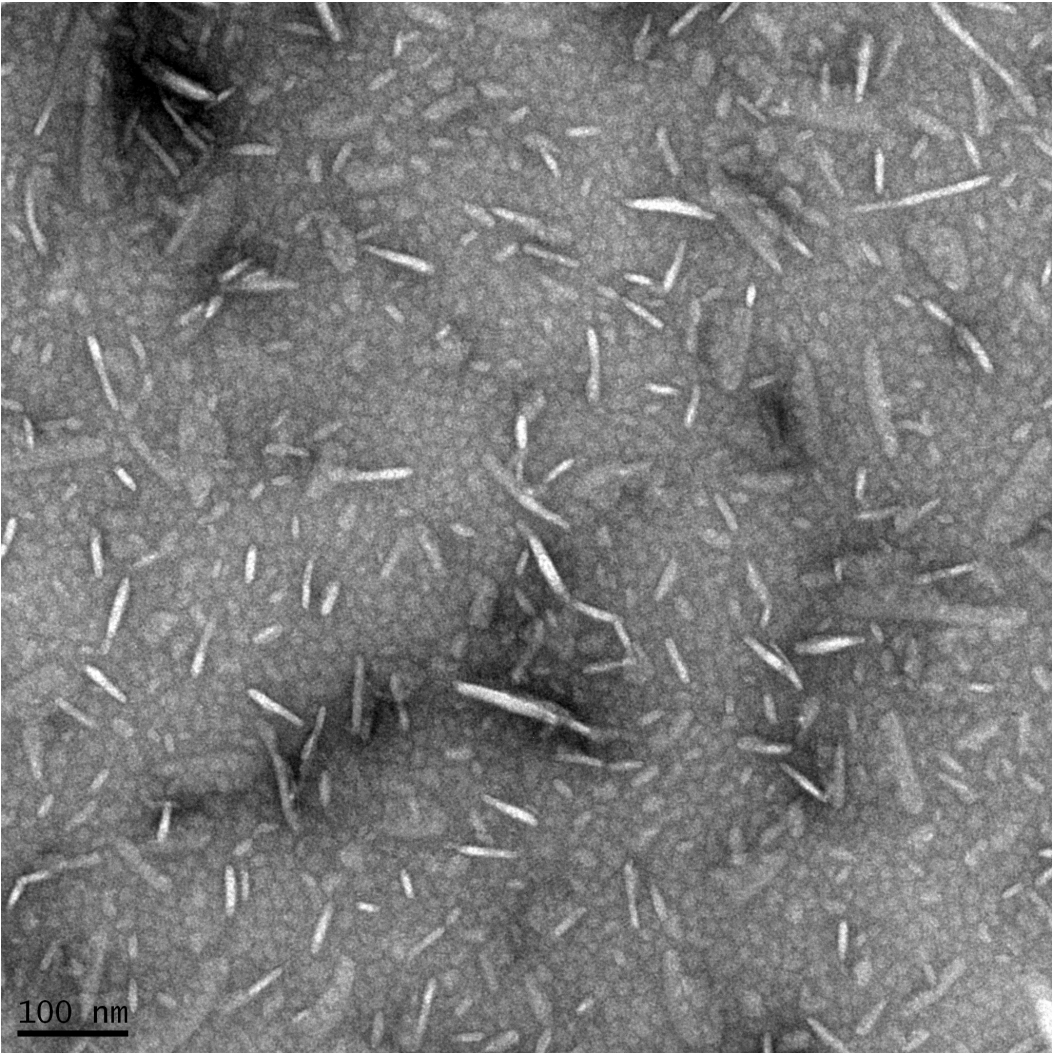

## Lipids + Hsp12

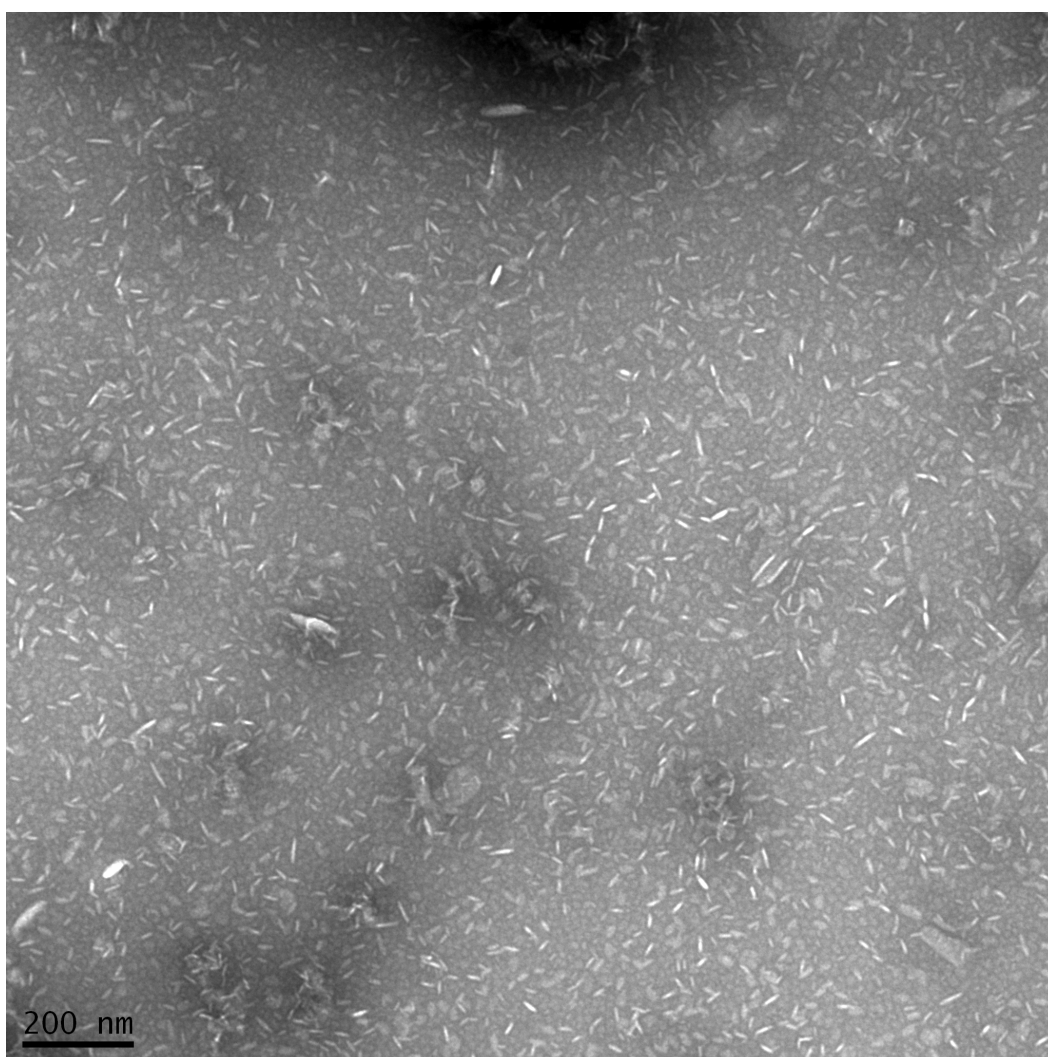

Supplement: supp [file elife-38337-supp-v1.zip]
