# Supplementary figures and images for: Synergy between the small intrinsically disordered protein Hsp12 and trehalose sustain viability after severe desiccation
Source: eLife journal article supplement (doi:10.7554/elife.38337), 2018-07-16

Figure Supplement 2.

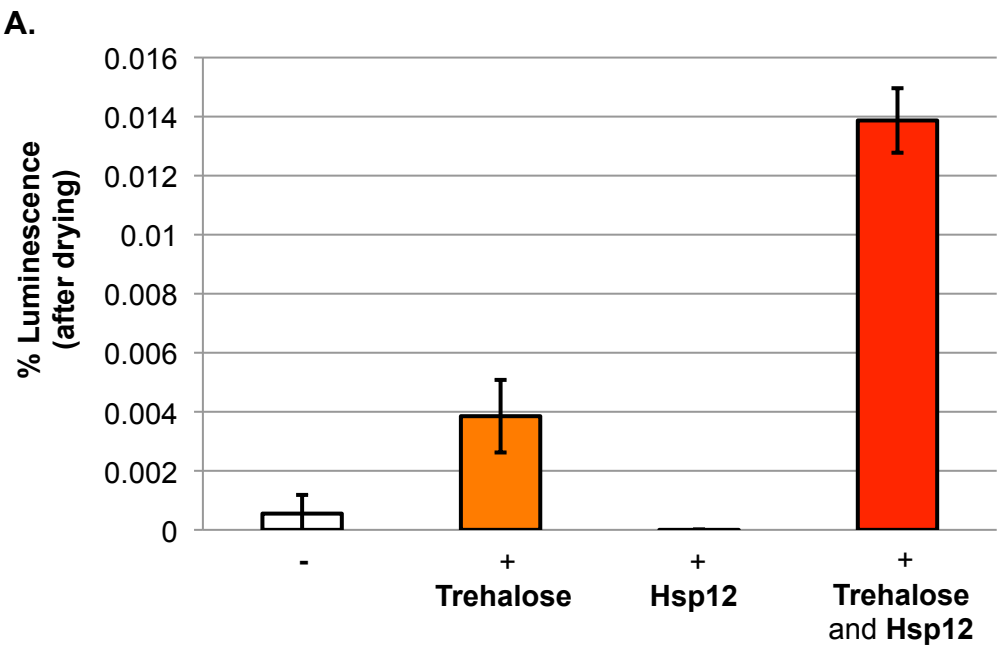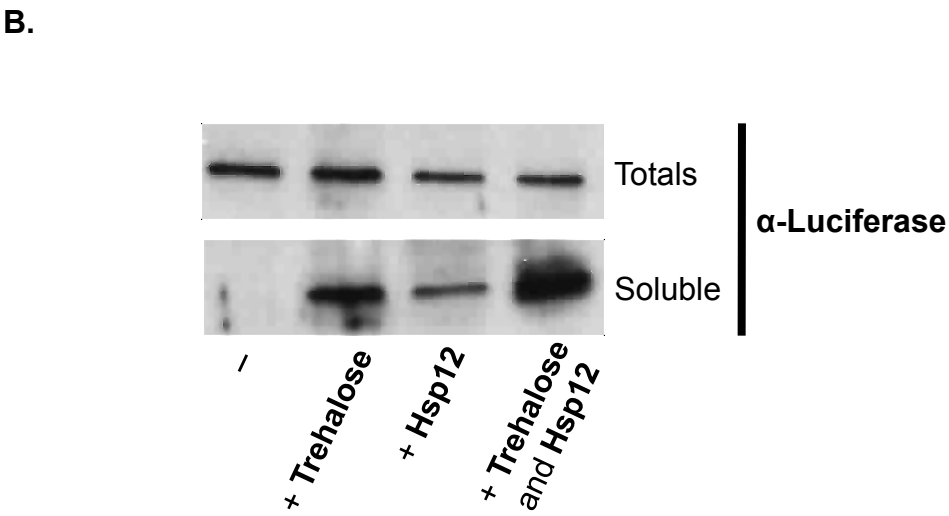

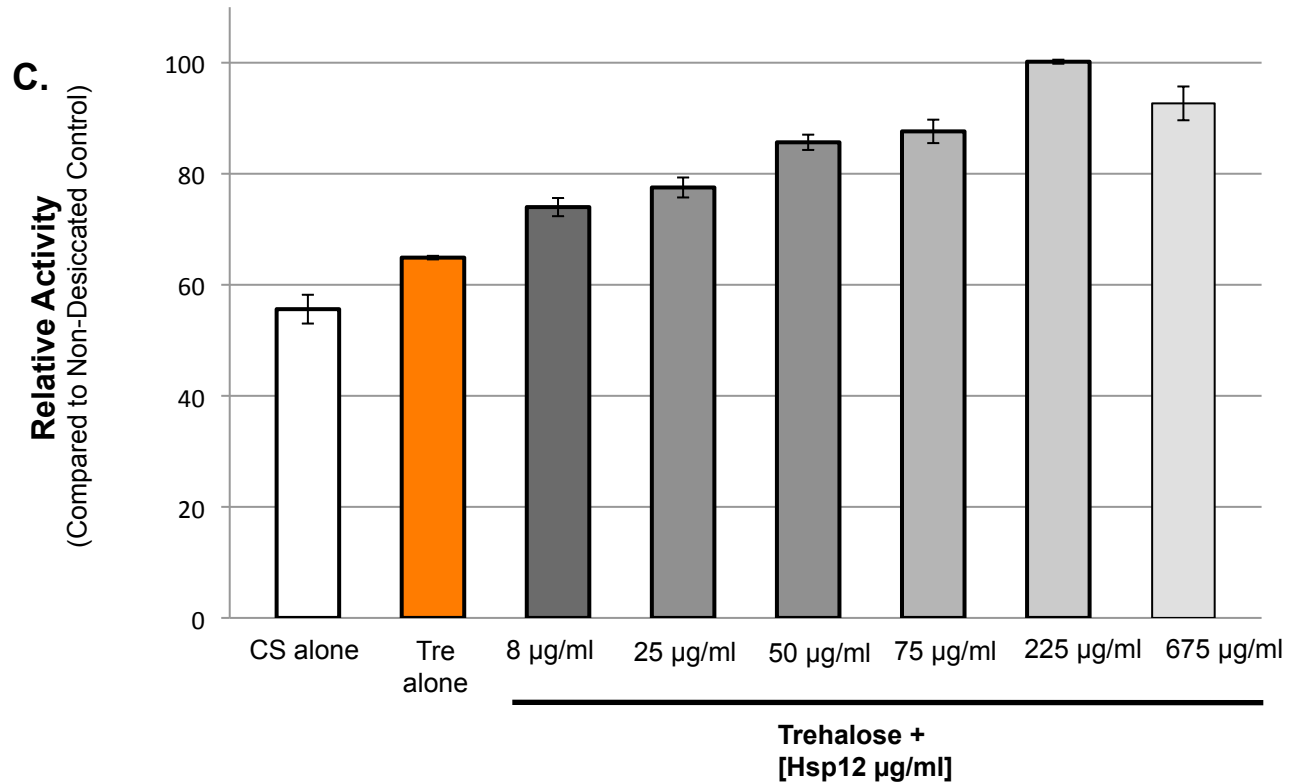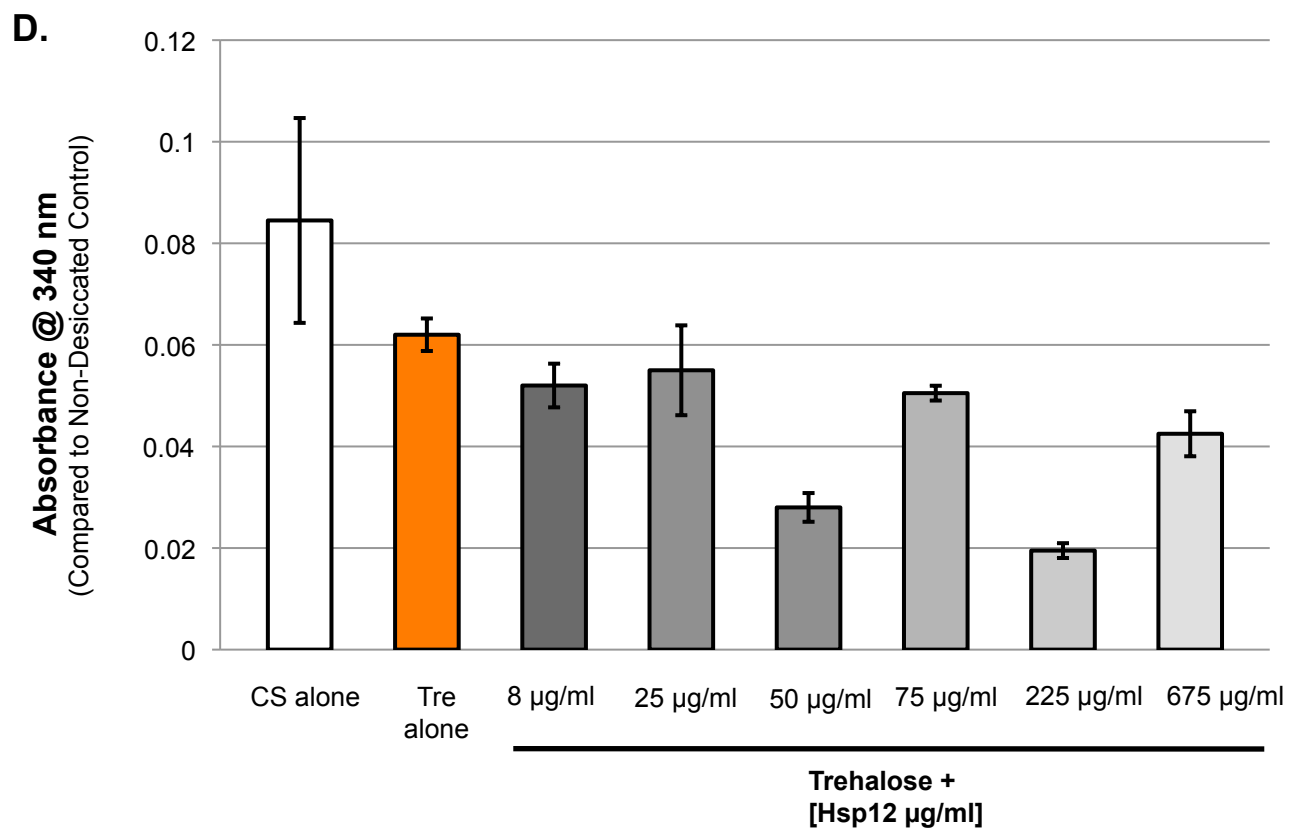

Supplement: supp [file elife-38337-supp-v1.zip]

Figure Supplement 5. Hsp12 and Stf2 are expressed in growing cells

A.

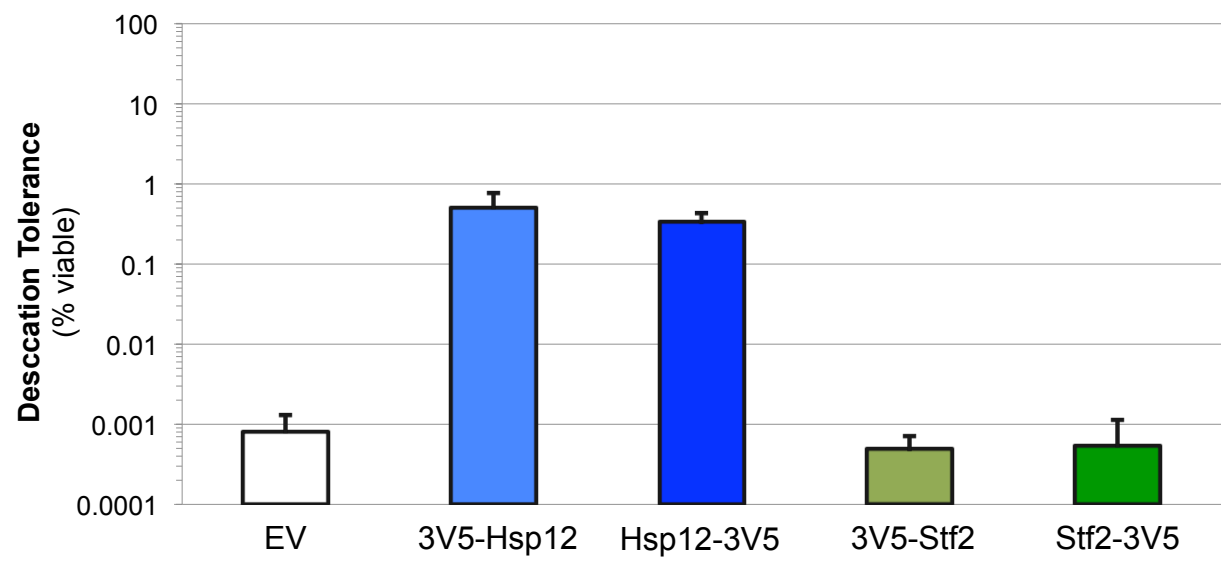

B.

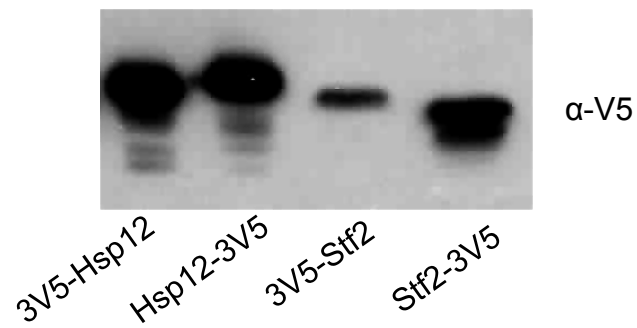

Supplement: supp [file elife-38337-supp-v1.zip]

# Supplementary Figure 1. Hsp12 and Stf2 purified protein

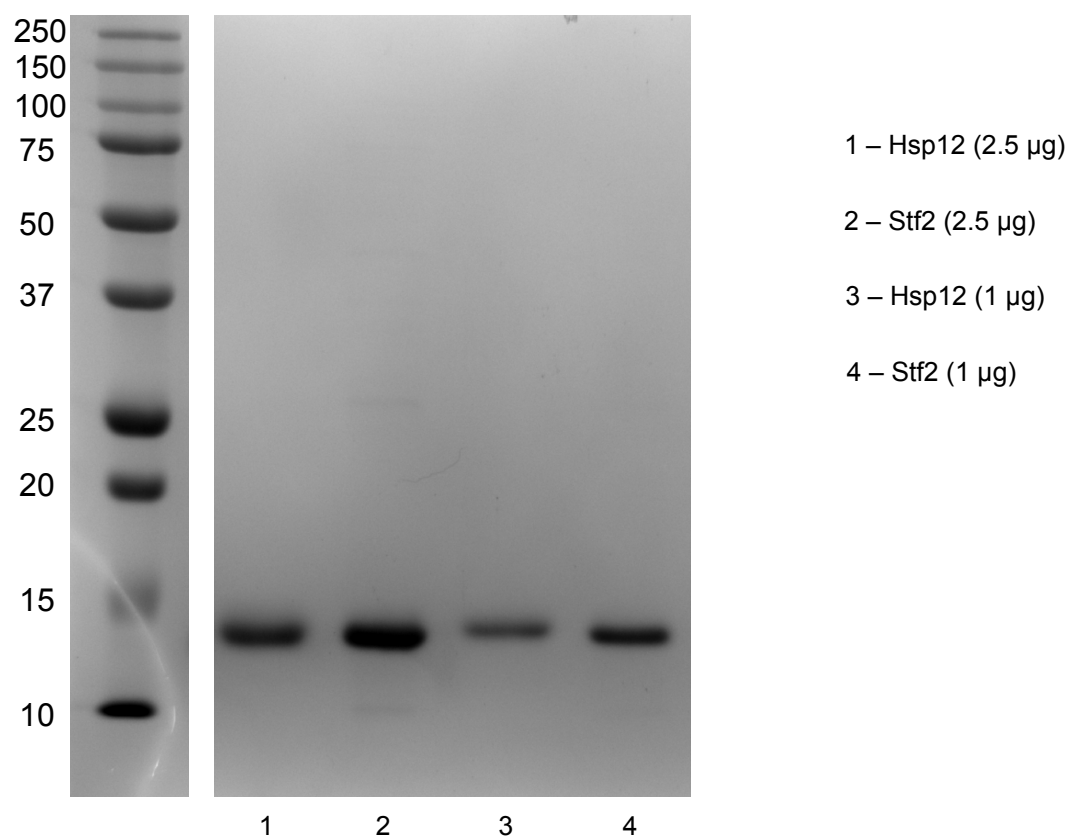

Supplement: supp [file elife-38337-supp-v1.zip]
